# Supplementary material
Source: Springer Nature journal article supplement (https://www.springermedizin.de/resource/supplementary/12990_2009_258_MOESM6_ESM.pdf/9612902)

## Vi/Vc

## A. Ipsilateral

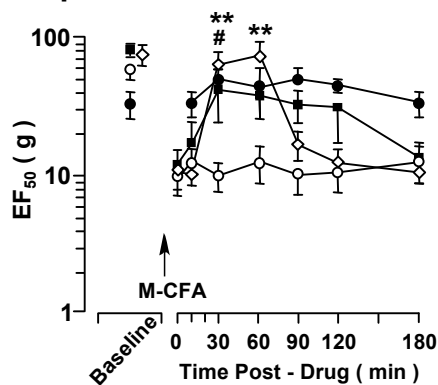

## Vc

## C. Ipsilateral

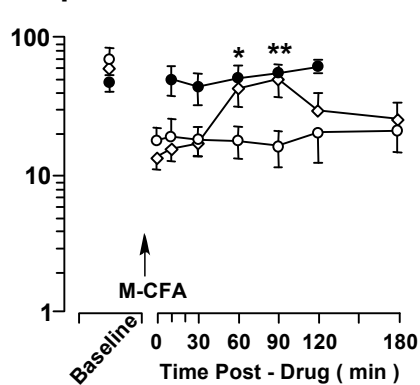

## Vc

## E. Ipsilateral

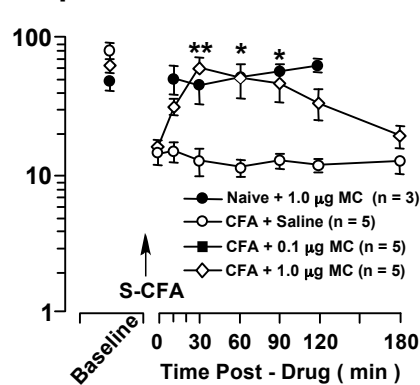

## B. Contralateral

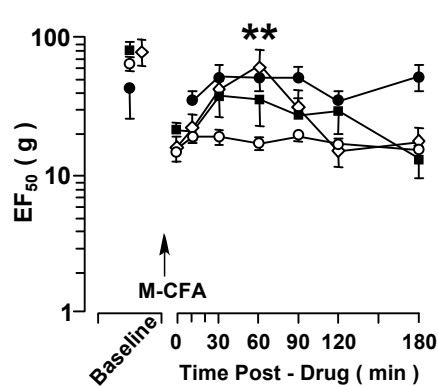

## D. Contralateral

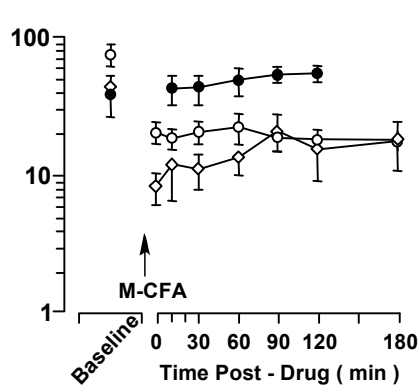

Supplement: MOESM6 [file 9612902]
